# Supplementary material
Source: publisher figshare collection journal article supplement (https://sage.figshare.com/ndownloader/files/13291985)
Supplement: Supplementary file 1 [file 13291985]

## Sheet: Table S1_online
Table S-1. Odds Ratios and 95% Confidence Intervals from Two-level Logistic Regression Models Predicting Mexican Migrants' Undocumented (Relative to Documented) Status on the Last Trip to the United States
	Model 1		Model 2		Model 3		Model 4		Model 5		Model 6
	Context of Indigeneity		Community Characteristics		Demographic Characteristics		Socioeconomic Characteristics		Migration Characteristics		Economic and Social Context
	OR	95% CI	OR	95% CI	OR	95% CI	OR	95% CI	OR	95% CI	OR	95% CI
Level 1: Individual or Household Measures
Context of Indigeneity (Ref: Low Indigeneity (<1%))
Moderate Indigeneity (1-10%)	1.58†	(0.97, 2.56)	1.73*	(1.09, 2.75)	1.76*	(1.13, 2.74)	1.76*	(1.11, 2.78)	1.73**	(1.18, 2.53)	1.80**	(1.25, 2.58)
High Indigeneity (>10%)	3.77***	(1.95,7.27)	2.88**	(1.52, 5.44)	2.76**	(1.50, 5.07)	2.53**	(1.36, 4.70)	2.14**	(1.31, 3.51)	2.25**	(1.30, 3.88)
Demographic Characteristics
Male (Ref: Female)					1.29***	(1.14, 1.47)	1.27**	(1.10, 1.47)	1.54***	(1.33, 1.78)	1.53***	(1.33, 1.77)
Year Born					1.04***	(1.04, 1.05)	1.05***	(1.04, 1.06)	1.03***	(1.03, 1.04)	1.03***	(1.03, 1.04)
Household Position (Ref: Not Head or Spouse)
Household Head					2.02***	(1.70, 2.42)	1.92***	(1.62, 2.29)	1.39***	(1.17, 1.67)	1.39**	(1.17, 1.67)
Spouse of Household Head					1.51***	(1.21, 1.88)	1.48**	(1.19, 1.83)	1.32*	(1.06, 1.64)	1.31*	(1.06, 1.63)
Married (Ref: Not Married)					0.86**	(0.77, 0.96)	0.84**	(0.75, 0.94)	0.77***	(0.69, 0.84)	0.77***	(0.68, 0.86)
Household Size					1.06***	(1.04, 1.07)	1.06***	(1.04, 1.07)	1.10***	(1.09, 1.13)	1.10***	(1.08, 1.12)
Socioeconomic Characteristics
Educational Attainment (Ref.: < Primary)
Primary							0.76***	(0.69, 0.84)	0.76***	(0.68, 0.84)	0.76***	(0.68, 0.84)
Secondary							0.37***	(0.32, 0.44)	0.37***	(0.31, 0.44)	0.37***	(0.31, 0.44)
University							0.23***	(0.18, 0.29)	0.20***	(0.15, 0.26)	0.20***	(0.15, 0.26)
Employment Sector (Ref: Primary)
Secondary							1.20*	(1.02, 1.41)	1.06	(0.91, 1.25)	1.07	(0.91, 1.25)
Tertiary							1.11	(0.92 1.33)	1.03	(0.87, 1.22)	1.03	(0.87, 1.22)
Quarternary							1	(0.81, 1.23)	0.89	(0.70, 1.13)	0.89	(0.70, 1.13)
Not in Labor Force							1.13	(0.91, 1.39)	1.07	(0.86, 1.33)	1.08	(0.86, 1.34)
Unemployed							0.91	(0.64, 1.31)	0.99	(0.71, 1.39)	1	(0.72, 1.40)
Finished Flooring (Ref: Dirt/Cement)							0.72***	(0.65, 0.81)	0.76***	(0.69, 0.84)	0.76***	(0.69, 0.85)
Number of Rooms in House							0.89***	(0.86, 0.92)	0.91***	(0.88, 0.94)	0.91***	(0.88, 0.94)
Migration Characteristics
Year of Last U.S. Trip									1	(0.99, 1.01)	1	(0.98, 1.01)
Domestic Trip									1.12†	(0.98, 1.29)	1.12†	(0.98, 1.29)
More than One U.S. Trip?									0.30***	(0.26, 0.34)	0.30***	(0.27, 0.34)
Year of First Migration in Household									1	(0.99, 1.01)	1	(0.98, 1.01)
Anyone Else in Household Documented?									0.23***	(0.20, 0.26)	0.23***	(0.20, 0.27)
Economic and Social Context in Last Migration Year
Visa Availability									0.01***	(0.00, 0.03)	0.01***	(0.00, 0.03)
Probability of Apprehension									11.2**	(2.39, 52.6)	10.6**	(2.30, 48.7)
% of Adults with Domestic Migration Experience in Community											0.81	(0.16, 4.08)
% of Municipal Population Earning < Minimum Wage											0.5	(0.14, 1.80)
% of Adults with U.S. Migration Experience in Community											0.07**	(0.02, 0.32)
Level 2: Community Measures
Intercept	2.75***	(2.30, 3.29)	2.74***	(2.35, 3.20)	2.63***	(2.26, 3.06)	2.76**	(2.37, 3.22)	2.55***	(2.26, 2.89)	2.16***	(1.88, 2.50)
Year of Survey			1.03*	(1.01, 1.06)	0.99	(0.97, 1.02)	1	(0.97, 1.03)	0.99	(0.97, 1.02)	0.99	(0.96, 1.01)
Average Number of Rooms			1.04	(0.81, 1.34)	0.99	(0.76, 1.28)	0.94	(0.88, 1.48)	1	(0.82, 1.23)	1.12	(0.93, 1.36)
Average Years of Education			0.98	(0.81, 1.20)	1	(0.82, 1.23)	1.11	(0.90, 1.37)	1.14†	(0.97, 1.35)	1.20*	(1.02, 1.41)
Metropolitan Category of Community (Ref.: Metropolitan Area)
Smaller Urban Area			1.47†	(0.97, 2.23)	1.39	(0.93, 2.07)	1.22	(0.81, 1.83)	1.68**	(1.16, 2.44)	2.15**	(1.38, 3.37)
Town			2.04**	(1.33, 3.12)	2.04**	(1.34, 3.09)	1.74*	(1.13, 2.70)	1.97**	(1.36, 2.86)	2.42**	(1.48, 3.95)
Rancho			2.27*	(1.15, 4.45)	2.29*	(1.17, 4.48)	1.97†	(0.99, 3.91)	2.57**	(1.45, 4.56)	3.71***	(1.93, 7.10)
Border State			0.35***	(0.20, 0.61)	0.36**	(0.21, 0.64)	0.34**	(0.19, 0.61)	0.33***	(0.20, 0.54)	0.34***	(0.20, 0.56)
Conditional Intraclass Coefficient (ICC)	0.248455		0.197265		0.188		0.19		0.119		0.11203
% of Unconditional ICC (.269)	0.922104		0.732121		0.698		0.706		0.441		0.415783
Level-1 N	19579		19579		19579		19579		19579		19579
Level-2 N	143		143		143		143		143		143
Notes: ***p<.001, **p<.01, *p<.05, †p<.1. All variables are grand-mean centered. Confidence intervals are calculated using robust standard errors. All variables observed at year of survey unless otherwise noted.

## Sheet: Table S2_online
Table S-2. Odds Ratios and 95% Confidence Intervals from Three-level Multinomial Regression Models Predicting Mexicans' Undocumented (Relative to Documented) Status on the Last Trip to the United States for Migrants and Non-migrants
	Model 1		Model 2		Model 3		Model 4		Model 5		Model 6
	Context of Indigeneity		Community Characteristics		Demographic Characteristics		Socioeconomic Characteristics		Migration Characteristics		Economic and Social Context
	OR	95% CI	OR	95% CI	OR	95% CI	OR	95% CI	OR	95% CI	OR	95% CI
Level 1: Individual Measures
Male (Ref: Female)					1.28**	(1.11, 1.48)	1.23**	(1.07, 1.41)	1.24**	(1.08, 1.43)	1.24**	(1.08, 1.43)
Year Born					1.03***	(1.02, 1.03)	1.03***	(1.03, 1.04)	1.03***	(1.03, 1.03)	1.03***	(1.03, 1.03)
Household Position (Ref: Not Head or Spouse)
Household Head					1.36***	(1.16, 1.60)	1.45***	(1.23, 1.72)	1.04	(0.88, 1.23)	1.04	(0.88, 1.23)
Spouse of Household Head					1.26*	(1.01, 1.56)	1.34**	(1.08, 1.67)	1.2	(0.96, 1.49)	1.2	(0.96, 1.49)
Married (Ref: Not Married)					0.87*	(0.77, 0.98)	0.85**	(0.76, 0.95)	0.86*	(0.77, 0.96)	0.86*	(0.77, 0.96)
Socioeconomic Characteristics
Educational Attainment (Ref.: < Primary)
Primary							0.92†	(0.84, 1.01)	0.95	(0.87, 1.04)	0.95	(0.87, 1.04)
Secondary							0.50***	(0.43, 0.58)	0.53***	(0.46, 0.61)	0.52***	(0.45, 0.60)
University							0.32***	(0.25, 0.41)	0.34***	(0.27, 0.43)	0.34***	(0.27, 0.43)
Employment Sector (Ref: Primary)
Secondary							1.35**	(1.11, 1.65)	1.37**	(1.13, 1.66)	1.37**	(1.13, 1.67)
Tertiary							1.38**	(1.11, 1.73)	1.40**	(1.12, 1.74)	1.40**	(1.12, 1.74)
Quarternary							1.18	(0.93, 1.51)	1.19	(0.93, 1.52)	1.19	(0.93, 1.52)
Not in Labor Force							1.03	(0.78, 1.36)	1.04	(0.79, 1.37)	1.04	(0.79, 1.37)
Unemployed							1.01	(0.70, 1.46)	1.01	(0.69, 1.47)	1.01	(0.69, 1.46)
Migration Characteristics
Domestic Trip									1.02	(0.89, 1.16)	1.01	(.89, 1.16)
Anyone Else in Household Documented?									0.32***	(0.28, 0.37)	0.32***	(0.28, 0.37)
Level 2: Household Measures
Demographic Characteristics
Household Size					1.05***	(1.03, 1.06)	1.05***	(1.04, 1.07)	1.08***	(1.07, 1.10)	1.08***	(1.07, 1.10)
Socioeconomic Characteristics
Finished Flooring (Ref: Dirt/Cement)							0.73***	(0.66, 0.82)	0.78***	(0.70, 0.86)	0.78***	(0.70, 0.86)
Number of Rooms in House							0.89***	(0.87, 0.92)	0.91***	(0.89, 0.93)	0.91***	(0.88, 0.93)
Level 3: Community- or Municipal-level Measures
Intercept	3.02***	(2.55, 3.57)	3.06***	(2.64, 3.55)	3.32***	(2.78, 3.96)	3.48***	(2.92, 4.14)	3.34***	(2.83, 3.94)	3.37***	(2.86, 3.96)
Context of Indigeneity (Ref: Low Indigeneity (<1%))
Moderate Indigeneity (1-10%)	1.47	(0.92, 2.35)	1.63*	(1.04, 2.53)	1.66*	(1.06, 2.60)	1.60*	(1.02, 2.50)	1.56*	(1.07, 2.26)	1.61**	(1.16, 2.24)
High Indigeneity (>10%)	3.44***	(1.85, 6.37)	2.71**	(1.49, 4.91)	2.71**	(1.50, 4.89)	2.47**	(1.37, 4.45)	2.29**	(1.36, 3.85)	2.27**	(1.27, 4.05)
Year of Survey			1.03*	(1.00, 1.06)	1.01	(0.98, 1.04)	1.01	(0.98, 1.04)	1.00†	(0.98, 1.03)	0.99	(0.97, 1.02)
Average Number of Rooms			1.04	(0.82, 1.32)	1	(0.78, 1.29)	0.97	(0.75, 1.25)	1	(0.81, 1.25)	1.14	(0.94, 1.38)
Average Years of Education			0.99	(0.81, 1.20)	1.01	(0.82, 1.23)	1.09	(0.89, 1.35)	1.11	(0.92, 1.33)	1.12	(0.94, 1.33)
Metropolitan Category of Community (Ref.: Metropolitan Area)
Smaller Urban Area			1.45†	(0.98, 2.14)	1.42†	(0.95, 2.10)	1.3	(0.88, 1.92)	1.42*	(1.01, 1.98)	1.74**	(1.20, 2.55)
Town			1.92**	(1.29, 2.87)	2.01**	(1.33, 3.04)	1.82**	(1.20, 2.76)	1.90***	(1.32, 2.72)	2.17**	(1.39, 3.39)
Rancho			2.16*	(1.14, 4.09)	2.23*	(1.16, 4.33)	2.05*	(1.06, 3.94)	2.24**	(1.27, 3.97)	2.90**	(1.55, 5.42)
Border State			0.36***	(0.22, 0.62)	0.35***	(0.20, 0.61)	0.33***	(0.19, 0.59)	0.39***	(0.24, 0.63)	0.37***	(0.23, 0.60)
Economic and Social Context in Survey Year
% of Municipal Population Earning < Minimum Wage											0.68	(0.20, 2.29)
% of Adults with Domestic Migration Experience in Community											1.74	(0.41, 7.40)
% of Adults with U.S. Migration Experience in Community											0.06***	(0.02, 0.23)
Level-3 Conditional ICC (for undocumented migration)	0.217		0.163976		0.166443		0.163204		0.11974		0.105731
% of Unconditional ICC (.239)	0.909447		0.687335		0.697677		0.6841		0.504		0.44319
Level-1 N	122797		122797		122797		122797		122797		122797
Level-2 N	22373		22373		22373		22373		22373		22373
Level-3 N	143		143		143		143		143		143
Notes: ***p<.001, **p<.01, *p<.05, †p<.1. All variables are grand-mean centered. Confidence intervals are calculated using robust standard errors. Results predicting no migration (relative to documented migration) are not shown and available upon request.
